# Supplementary material for: A high performance SnO2/C nanocomposite cathode for aluminum-ion batteries
Source: Royal Society of Chemistry journal article supplement (doi:10.1039/c8ta11132d), 2019-01-01
Supplement: c8ta11132d1.pdf [file c8ta11132d1.pdf]

## Supporting Information

### High Performance SnO<sub>2</sub>/C Nanocomposite Cathode for Aluminum-Ion Battery

*Hongyan Lu,<sup>1, †</sup> Yuanxin Wan,<sup>2,1,3 †</sup> Tianyi Wang,<sup>1</sup> Rong Jin,<sup>1</sup> Peitao Ding,<sup>1</sup> Rong Wang,<sup>1</sup> Yong Wang,<sup>2</sup> Chao Teng,<sup>2</sup> Linling Li,<sup>1</sup> Xiaoliang Wang,<sup>1,\*</sup> Dongshan Zhou,<sup>4,3,1,\*</sup> and Gi Xue<sup>1</sup>*

<sup>1</sup> Department of Polymer Science and Engineering, School of Chemistry and Chemical Engineering, State Key Laboratory of Coordination Chemistry, Key Laboratory of High Performance Polymer Materials and Technology, MOE, Nanjing University, Nanjing, 210093, China.

<sup>2</sup> School of Advanced Materials, Peking University Shenzhen Graduate School, Shenzhen, 518055, China.

<sup>3</sup> Sheyang Research Institute, Nanjing University, Sheyang, 224300, China.

<sup>4</sup> Shenzhen Research Institute, Nanjing University, Shenzhen, 518057, China.

\*Correspondence and requests for materials should be addressed to D.Z. & X.W. (email: [dzhou@nju.edu.cn](mailto:dzhou@nju.edu.cn), [wangxiaoliang@nju.edu.cn](mailto:wangxiaoliang@nju.edu.cn)).

†These authors contributed equally to this work.

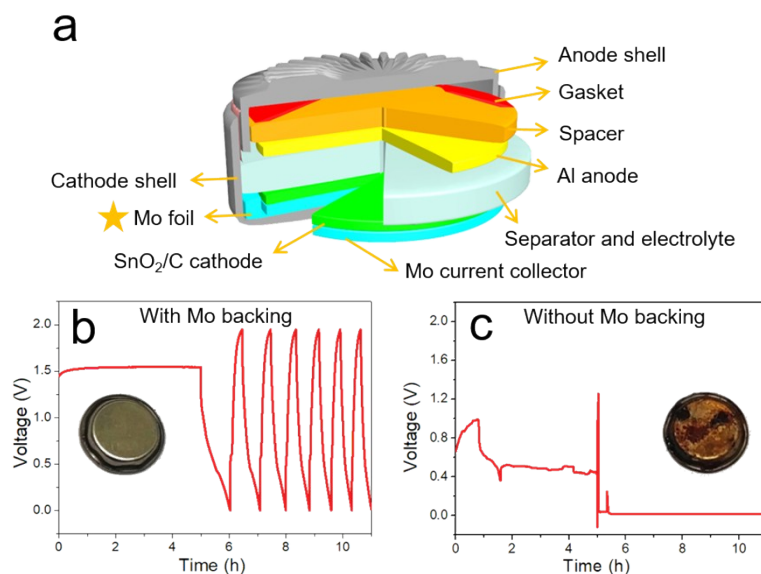

**Fig. S1** a) Schematic illustration of the CR2032 coin-type cell assembly. b,c) the voltage-time curves of AIBs with and without Mo backing. All the cells were maintained for 5 hours before test. The voltage of cells with Mo backing remains 1.5 V during the initial 5 hours, while the voltage of the cells without Mo backing is fickle (range from 0.3 to 1 V) with a significant voltage decay. Insets are the photographs of cathode shells with and without Mo backing after the discharge/charge processes. The thickness of Mo foil is 20  $\mu\text{m}$ . As shown clearly, the cathode shell with molybdenum foil backing is not corroded and the cell can work normally, while the cathode shell without molybdenum foil backing is strongly corroded and the cell cannot work.

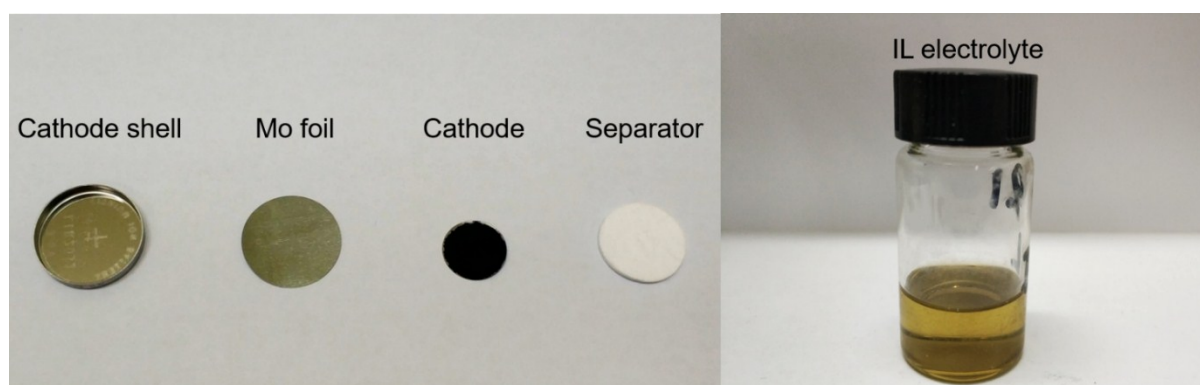

**Fig. S2** Photograph of coin cell components. From left to right: cathode shell, Mo foil, cathode, separator, and IL electrolyte.

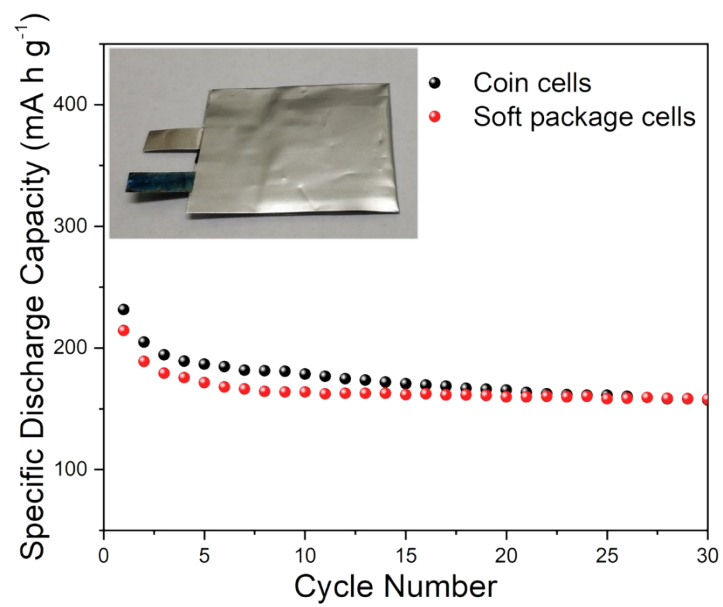

**Fig. S3** Specific discharge capacities of coin cells and soft package cells at 500 mA g<sup>-1</sup>.

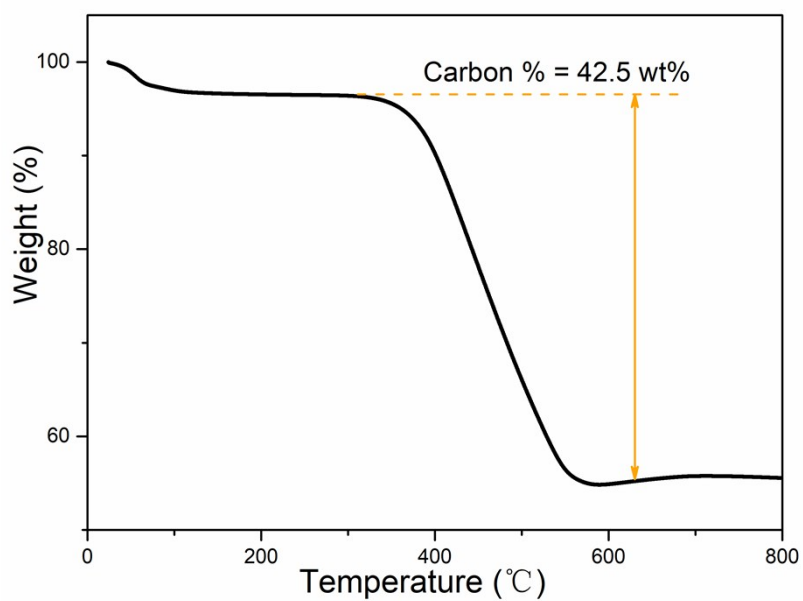

**Fig. S4** TGA of the as-prepared SnO<sub>2</sub>/C powder. The TGA measurement was performed under air atmosphere with a heating rate of 10 °C min<sup>-1</sup>. The weight ratio of the carbon in the SnO<sub>2</sub>/C nanocomposite is calculated to be 42.5 wt%.

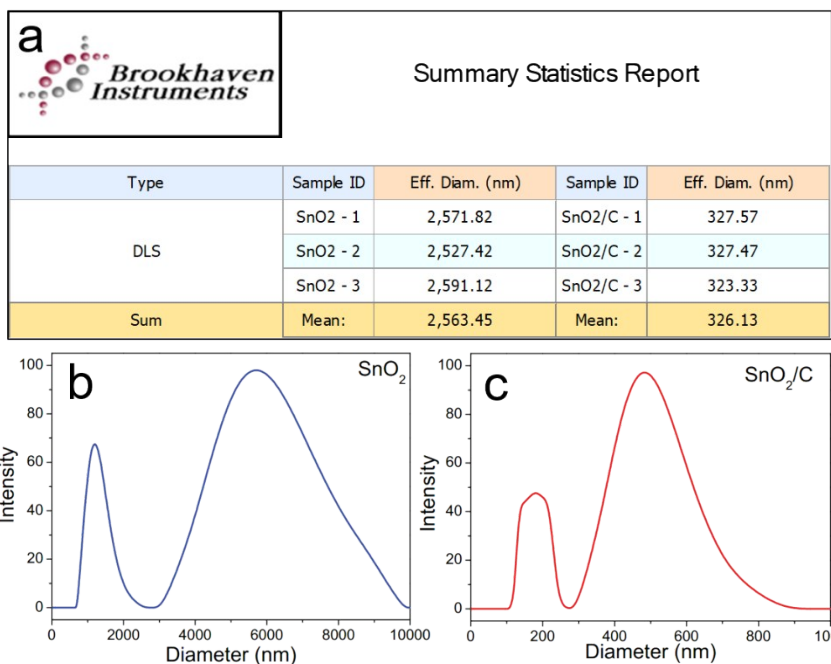

**Fig. S5** a) Particle size statistics report for the as-prepared SnO<sub>2</sub> and SnO<sub>2</sub>/C powder. b,c) Particle size distributions by intensity of the SnO<sub>2</sub> and SnO<sub>2</sub>/C powder.

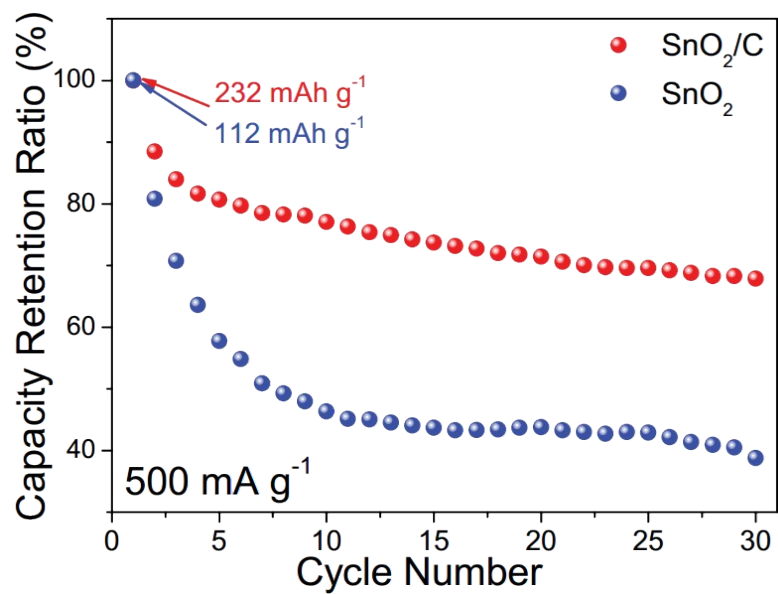

**Fig. S6** Discharge capacity retention of SnO<sub>2</sub> and SnO<sub>2</sub>/C cells within a voltage window of 0.05~1.95 V vs. Al/Al<sup>3+</sup> at a current density of 500 mA g<sup>-1</sup>. The discharge capacity retention of SnO<sub>2</sub> and SnO<sub>2</sub>/C were 67.8% and 39% after 30 cycles, respectively. SnO<sub>2</sub>/C performs much better than SnO<sub>2</sub> both in cycling stability and discharge capacities.

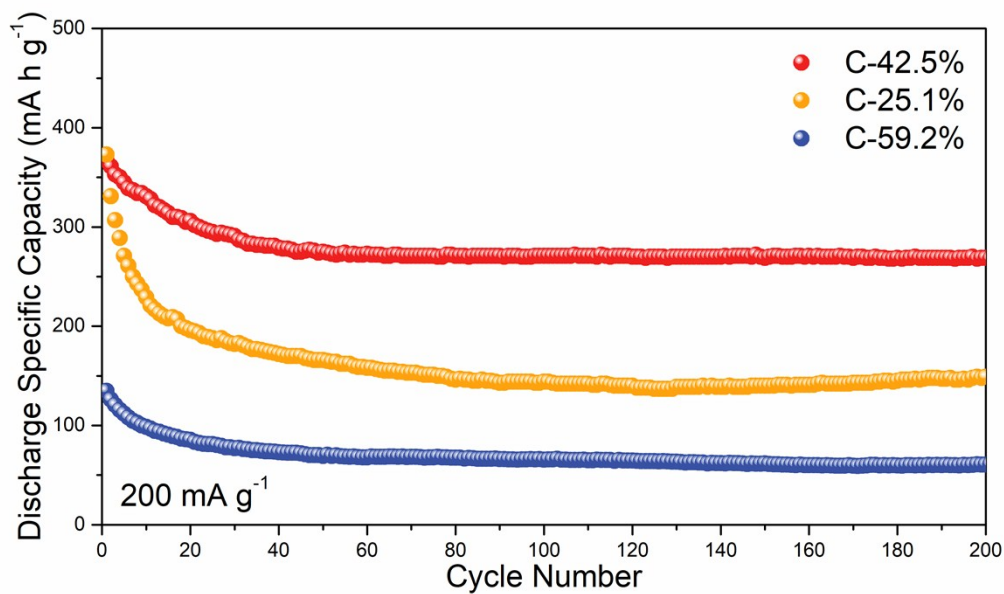

**Fig. S7** Discharge specific capacities of SnO<sub>2</sub>/C cells with different carbon content within a voltage window of 0.05~1.95 V vs. Al/Al<sup>3+</sup> at a current density of 200 mA g<sup>-1</sup>. The results suggest that insufficient carbon content leads to poor cycling stability, while excessive carbon content decreases the discharge capacity, moderate carbon content is conducive to improve the stability and discharge capacity of the cells.



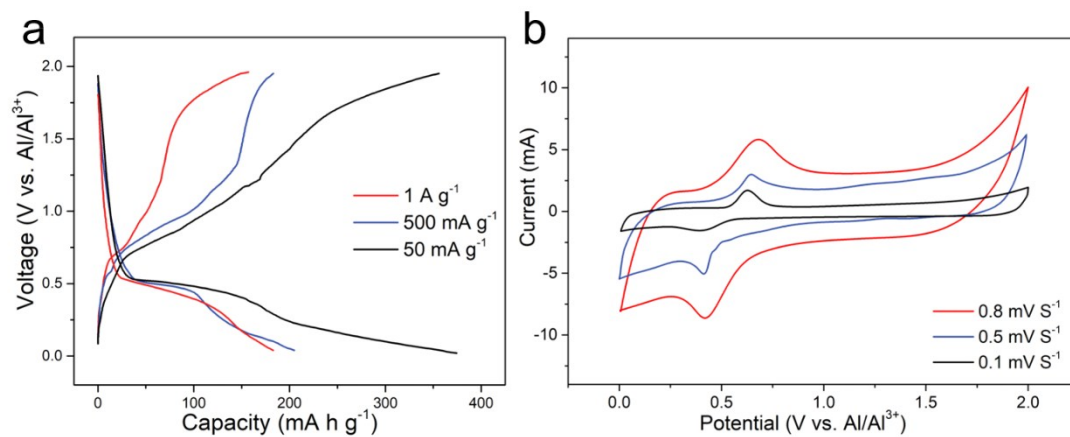

**Fig. S8** Charge/discharge voltage profiles of different current densities and CV curves of the third cycles at different scan rates.

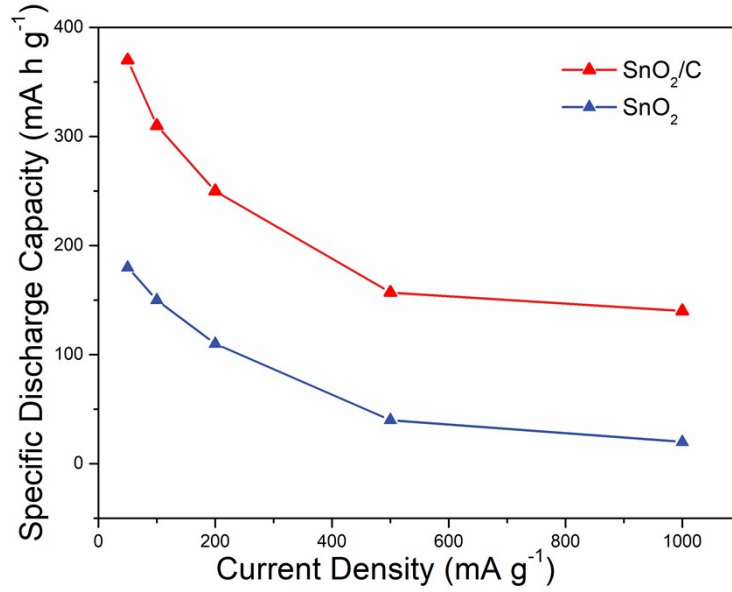

**Fig. S9** Stabilized specific discharge capacities of SnO<sub>2</sub> and SnO<sub>2</sub>/C cells at different current densities. The 50th discharge specific capacities at different current densities were used. It is revealed in the body of the article that the discharge capacities of the cells regained stability after 10th cycle due to the stabilization of side reactions. The SnO<sub>2</sub>/C undergoes a high stabilized discharge capacity of 370 mA h g<sup>-1</sup> compared with 180 mA h g<sup>-1</sup> of the SnO<sub>2</sub> at a current density of 50 mA g<sup>-1</sup>. Even at a high current density of 1 A g<sup>-1</sup>, the discharge capacities of SnO<sub>2</sub>/C could remain 140 mA h g<sup>-1</sup>, while there is only 20 mA h g<sup>-1</sup> left in the SnO<sub>2</sub>.

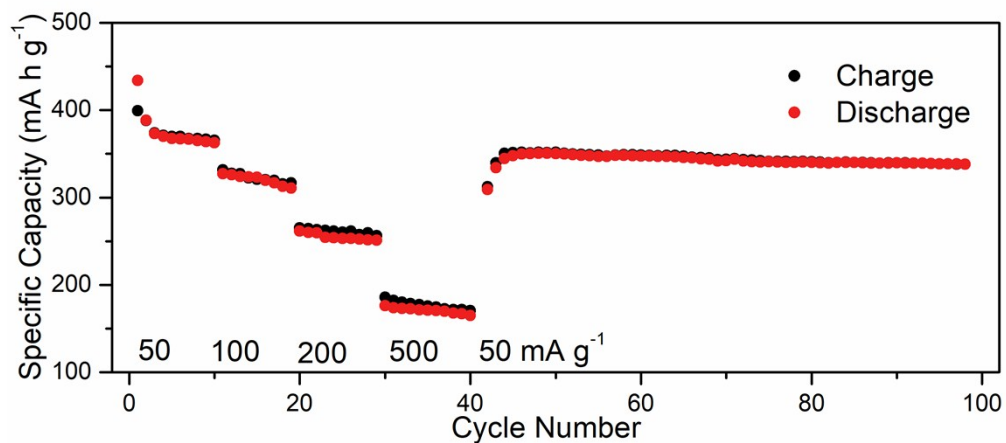

**Fig. S10** The rate performance of SnO<sub>2</sub>/C cathode at various current densities ranging from 50 to 500 mA g<sup>-1</sup>. As shown, SnO<sub>2</sub>/C cells deliver a stabilized discharge capacity of 370, 310, 250, 157 mA h g<sup>-1</sup> at current densities of 50, 100, 200, 500 mA g<sup>-1</sup>, respectively. In addition, the discharge capacity can recover to 350 mA h g<sup>-1</sup> when change the current density from 500 mA g<sup>-1</sup> back to 50 mA g<sup>-1</sup>.

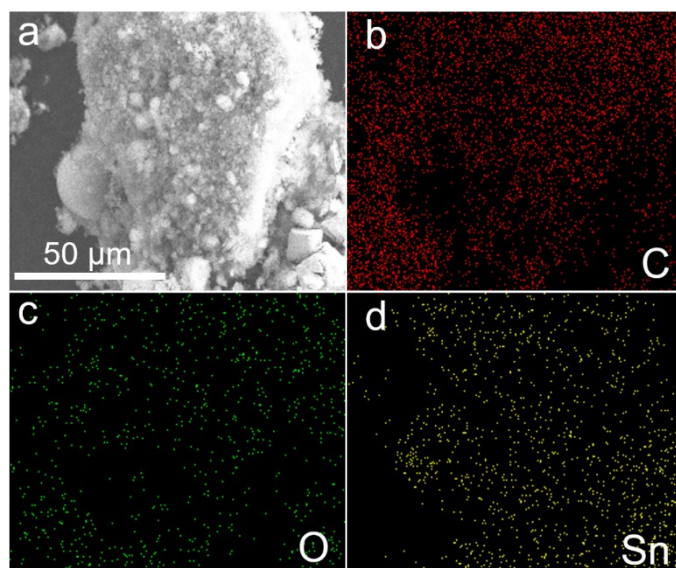

**Fig. S11** SEM image and element mapping images of SnO<sub>2</sub>/C powder. The images show the uniform distribution of C, O and Sn all over the SnO<sub>2</sub>/C nanocomposite.

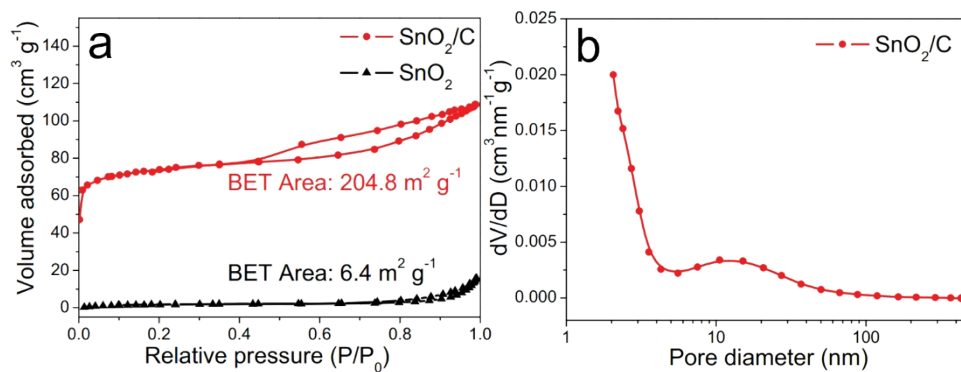

**Fig. S12** a) N<sub>2</sub> adsorption-desorption isotherms of the SnO<sub>2</sub> and SnO<sub>2</sub>/C powder. The BET specific surface area is 6.4 m<sup>2</sup> g<sup>-1</sup> for SnO<sub>2</sub> and 204.8 m<sup>2</sup> g<sup>-1</sup> for SnO<sub>2</sub>/C. The specific surface area of the SnO<sub>2</sub>/C is 32 times larger than that of the SnO<sub>2</sub>. b) Pore-size distribution of SnO<sub>2</sub>/C powder.

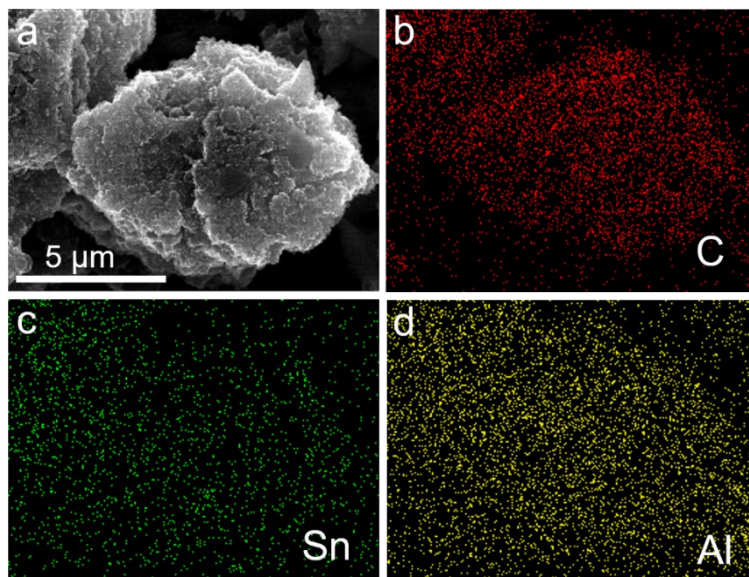

**Fig. S13** SEM image and element mapping images of SnO<sub>2</sub>/C cathode at fully discharge state. As shown, a large amount of Al exists in the cathode, indicating the insertion of Al<sup>3+</sup> into the cathode.

According to the Bragg's Law:

$$2d\sin\theta = n\lambda$$

Where  $d$  represents the lattice spacing,  $\theta$  is the angle between the incident ray, the reflected ray and the reflecting surface,  $n$  represents the reflection series, and  $\lambda$  is the wave length of the X-ray ( $\lambda = 1.5405 \text{ \AA}$ ). As shown in Supplementary Table 1, the slight  $2\theta$  shift reflects to only  $\sim 0.01 \text{ \AA}$  change in the lattice spacing.

**Table S1. Lattice spacing calculated by Bragg's Law.**

| <b>2theta / °</b> | <b>lattice spacing / Å<br/>(calculated)</b> | <b>lattice plane</b> |
|-------------------|---------------------------------------------|----------------------|
| 26.6 (pristine)   | 3.348                                       | (110)                |
| 26.5 (cycled)     | 3.361                                       | (110)                |
| 33.9 (pristine)   | 2.642                                       | (101)                |
| 33.8 (cycled)     | 2.650                                       | (101)                |

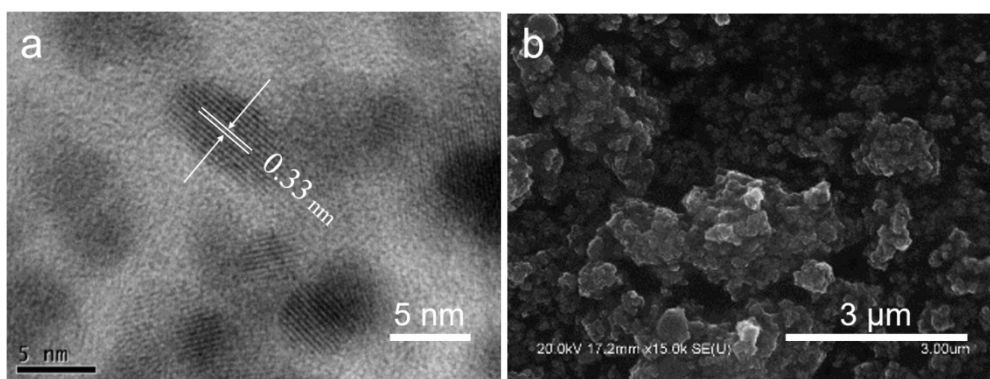

**Fig. S14** a) HRTEM and b) SEM images of the SnO<sub>2</sub>/C electrodes under fully discharge state after 20,000 cycles.



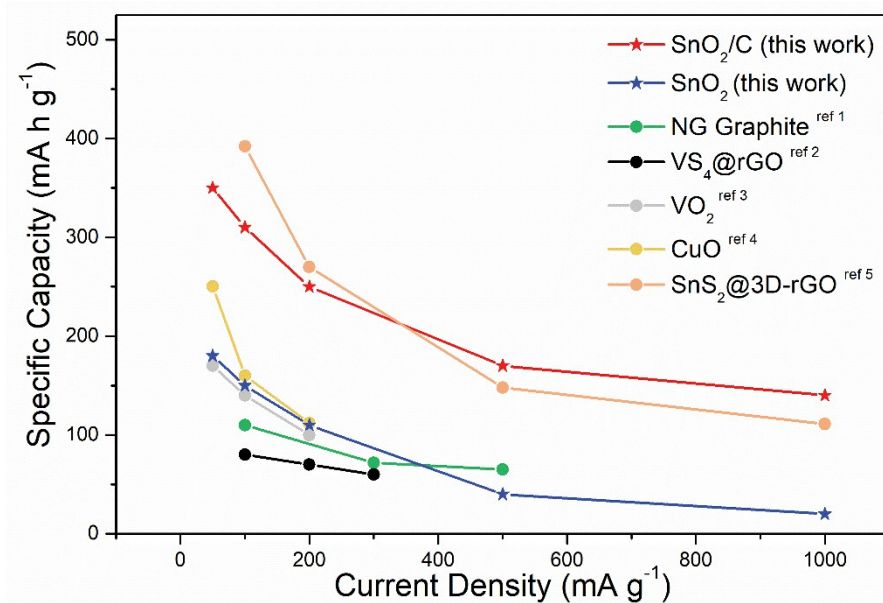

**Fig. S15** Rate performances of SnO<sub>2</sub>/C and other representative AIB cathode materials. SnO<sub>2</sub>/C cells exhibit large discharge capacities among the investigated AIB cathodes.

**Table S2. Cycling performance of SnO<sub>2</sub>/C and other AIBs cathode materials.**

| <b>Cathode</b>                            | <b>Cycle number</b> | <b>Current density<br/>(mA g<sup>-1</sup>)</b> | <b>Specific discharge<br/>capacity (mA h g<sup>-1</sup>)</b> |
|-------------------------------------------|---------------------|------------------------------------------------|--------------------------------------------------------------|
| SnO <sub>2</sub> /C <sup>this work</sup>  | 16,000              | 2,000                                          | 72                                                           |
|                                           | 1,100               | 1,000                                          | 140                                                          |
| NG graphite <sup>ref 1</sup>              | 6,000               | 60                                             | 60                                                           |
|                                           |                     | 100                                            | 80                                                           |
| VS <sub>4</sub> @rGO <sup>ref 2</sup>     | 100                 | 200                                            | 70                                                           |
|                                           |                     | 300                                            | 60                                                           |
|                                           |                     | 50                                             | 116                                                          |
| VO <sub>2</sub> <sup>ref 3</sup>          | 100                 | 50                                             | 130                                                          |
| CuO <sup>ref 4</sup>                      | 100                 | 100                                            | 121                                                          |
|                                           |                     | 200                                            | 112                                                          |
|                                           |                     | 1000                                           | 112                                                          |
| SnS <sub>2</sub> @3D-rGO <sup>ref 5</sup> | 100                 | 1000                                           | 112                                                          |

## References

1. D. Y. Wang, C. Y. Wei, M. C. Lin, C. J. Pan, H. L. Chou, H. A. Chen, M. Gong, Y. Wu, C. Yuan, M. Angell, Y. J. Hsieh, Y. H. Chen, C. Y. Wen, C. W. Chen, B. J. Hwang, C. C. Chen and H. Dai, *Nat. Commun.*, 2017, **8**, 14283.
2. X. Zhang, S. Wang, J. Tu, G. Zhang, S. Li, D. Tian and S. Jiao, *ChemSusChem*, 2018, **11**, 709-715.
3. W. Wang, B. Jiang, W. Xiong, H. Sun, Z. Lin, L. Hu, J. Tu, J. Hou, H. Zhu and S. Jiao, *Sci. Rep.*, 2013, **3**, 3383.
4. X. Zhang, G. Zhang, S. Wang, S. Li and S. Jiao, *J. Mater. Chem. A*, 2018, **6**, 3084-3090.
5. Y. Hu, B. Luo, D. Ye, X. Zhu, M. Lyu and L. Wang, *Adv. Mater.*, 2017, **29**.
